# Supplementary material
Source: PubMed Central journal article supplement (PMC4807855)
Supplement: NIHMS766938-supplement-SI.pdf [file NIHMS766938-supplement-SI.pdf]

## Supporting Information

# Celastrol inhibits *Plasmodium falciparum* enoyl-acyl carrier protein reductase

Lorillee C. Tallorin,<sup>a†</sup> Jacob D. Durrant,<sup>a- b†</sup> Quynh G. Nguyen,<sup>a</sup> J. Andrew McCammon,<sup>a-c</sup> and Michael D. Burkart<sup>a</sup>

<sup>a</sup> Department of Chemistry and Biochemistry, University of California, San Diego, La Jolla, California 92093-0365, USA

<sup>b</sup> Department of Pharmacology, University of California, San Diego, La Jolla, California 92093-0365, USA

<sup>c</sup> Howard Hughes Medical Institute, University of California, San Diego, La Jolla, California 92093-0365, USA

†These authors contributed equally.

### Table of Contents

|                                                                                                                                                                                    | Page |
|------------------------------------------------------------------------------------------------------------------------------------------------------------------------------------|------|
| <b>Table S1.</b> Virtual screen scores                                                                                                                                             | 3-9  |
| <b>Table S2.</b> Kinetic parameters calculated for <i>Pf</i> ENR                                                                                                                   | 10   |
| <b>Figure S1.</b> 12% SDS-PAGE showing expression and purification of <i>P.falciparum</i> ENR in pET28a plasmid encoding N-terminus 6xHis-tag in <i>E.coli</i> BL21 cells.         | 11   |
| <b>Figure S2.</b> Michaelis-Menten plots for <i>P. falciparum</i> ENR measuring the consumption of NADH at 340 nm for varying the concentration of Crotonyl-CoA and NADH at 27 °C. |      |
| <b>Figure S3.</b> IC <sub>50</sub> binding curves for triclosan (TCL)                                                                                                              | 13   |
| <b>Figure S4.</b> <sup>1</sup> H NMR and <sup>13</sup> C NMR Spectra of compound <b>1</b>                                                                                          | 14   |
| <b>Figure S5.</b> LC-MS Trace of compound <b>1</b> (NCI)                                                                                                                           | 15   |
| <b>Figure S6.</b> LC-MS Trace of compound <b>1</b> (Sigma-Aldrich)                                                                                                                 | 16   |
| <b>Figure S7a and S7b.</b> The K <sub>m, app</sub> and V <sub>max, app</sub> plotted as a function of celastrol concentration                                                      | 17   |
| <b>S8.</b> IC <sub>50</sub> of celastrol in the presence of 0.01% Triton-X                                                                                                         | 18   |
| <b>S9.</b> <i>Pf</i> ENR activity with celastrol by rapid dilution                                                                                                                 | 19   |
| <b>S10.</b> <i>Pf</i> ENR activity comparing treatment with and without iodoacetamide in the presence of celastrol                                                                 | 20   |
| <b>Figure S11.</b> Proposed interactions of compound <b>1</b> in <i>Pf</i> ENR pocket                                                                                              | 21   |

### SI References

- (1) Weisman JL, Liou AP, Shelat AA, Cohen FE, Kiplin Guy R, et al. (2006) Searching for New Antimalarial Therapeutics amongst Known Drugs. *Chem Biol Drug Des* 67: 409–416. doi:10.1111/j.1747-0285.2006.00391.
- (2) Kapoor M, Jamal Dar M, Surolia A, Surolia N (2001) Kinetic Determinants of the Interaction of Enoyl-ACP Reductase from *Plasmodium falciparum* with Its Substrates and Inhibitors. *Biochem Biophys Res Commun* 289: 832–837. doi:10.1006/bbrc.2001.6061.

**Table S1**

| Name            | PDB ID | Score<br>(kcal/mol) | Structure                                                                            |
|-----------------|--------|---------------------|--------------------------------------------------------------------------------------|
| Celastrol       | 2OL4:A | -12.8               | 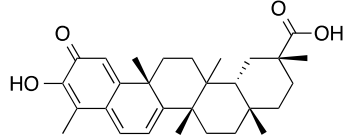   |
| Aclarubicin     | 1UH5:B | -12.6               |    |
| Gambogic acid   | 1ZSN:B | -12.6               |    |
| Aclacinomycin Y | 2OL4:A | -12.3               |   |
| Salinomycin     | 1UH5:B | -11.9               |  |
| Lasalocid       | 2O2Y:D | -11.8               |  |
| Dequalinium     | 1VRW:B | -11.5               |  |

|                        |        |       |                                                                                       |
|------------------------|--------|-------|---------------------------------------------------------------------------------------|
| Emetine                | 2OOS:B | -11.5 | 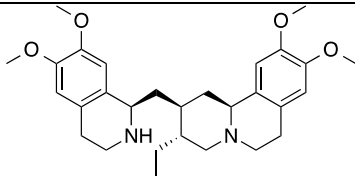     |
| Tannic acid            | 1NNU:A | -11.4 |     |
| Aklavine hydrochloride | 1V35:B | -11.2 |     |
| Nicergoline            | 1VRW:B | -11.2 |     |
| Monensin sodium        | 2NQ8:B | -11.2 |    |
| Methylergonovine       | 2O2Y:C | -11.1 |   |
| Puromycin              | 2OL4:B | -11.1 |   |
| Hydroxyprogesterone    | 2OOS:B | -10.7 |  |
| Mefloquine             | 1VRW:A | -10.6 |  |

|              |        |       |                                                                                       |
|--------------|--------|-------|---------------------------------------------------------------------------------------|
| Tetrandrine  | 2OL4:A | -10.6 | 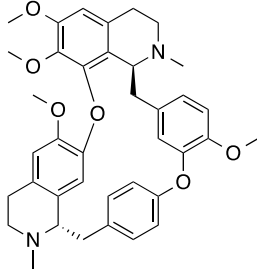   |
| Methotrexate | 2OL4:B | -10.6 |     |
| Homidium     | 2OL4:B | -10.4 |    |
| Ivermectin   | 2OL4:A | -10.2 |     |
| Deoxygedunin | 1VRW:A | -10.1 |   |
| Thioridazine | 2OP0:B | -10.1 |  |
| Bebeerine    | 1NNU:A | -10.0 |   |
| Selamectin   | 2NQ8:B | -10.0 |   |

|                      |        |       |                                                                                       |
|----------------------|--------|-------|---------------------------------------------------------------------------------------|
| Amodiaquine          | 2OOS:B | -10.0 | 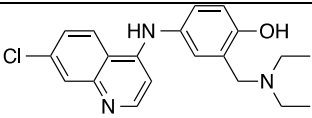     |
| Dihydroartemisinin   | 1ZW1:A | -9.9  |    |
| Quinine              | 2OL4:B | -9.9  |    |
| Cinchonine           | 2OL4:B | -9.9  |    |
| Rutilantinone        | 1V35:A | -9.8  |    |
| Coralyne             | 1VRW:A | -9.8  |   |
| Lycorine             | 1VRW:B | -9.8  |  |
| Methylbenzethonium   | 1VRW:B | -9.8  |   |
| Benzethonium         | 2O2Y:C | -9.8  |   |
| 3,7-Dihydroxyflavone | 2OOS:B | -9.8  |  |
| Cabergoline          | 2OOS:B | -9.8  |   |

|                         |        |      |                                                                                       |
|-------------------------|--------|------|---------------------------------------------------------------------------------------|
| Quinidine               | 1VRW:A | -9.7 | 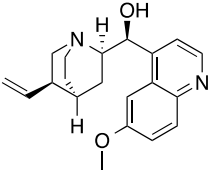   |
| Cinchonidine            | 2OL4:B | -9.7 |    |
| Hydroquinidine          | 2OL4:B | -9.7 |    |
| Alexidine hydrochloride | 2OP0:B | -9.7 |     |
| Gentian violet          | 1ZXB:B | -9.5 |    |
| Pergolide               | 1VRW:B | -9.4 |   |
| Rhodomyrtxin B          | 1ZXB:A | -9.4 |   |
| Pararosaniline          | 1UH5:A | -9.3 |  |
| Cycloheximide           | 1VRW:B | -9.3 |  |
| Mitomycin               | 1ZXB:A | -9.3 |  |
| Hydroxychloroquine      | 2OOS:B | -9.3 |   |

|                 |        |      |                                                                                       |
|-----------------|--------|------|---------------------------------------------------------------------------------------|
| Perhexiline     | 2OP1:B | -9.1 | 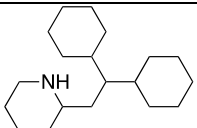    |
| Quinacrine      | 1UH5:A | -9.0 |     |
| Chlorprothixene | 1VRW:A | -9.0 |    |
| Cyclosporin A   | 2OL4:A | -9.0 |     |
| Tilorone        | 2OL4:B | -9.0 |    |
| Propafenone     | 1UH5:B | -8.9 |  |
| Mitoxantrone    | 1VRW:B | -8.9 |   |
| Angloensin      | 2O2Y:C | -8.8 |  |
| Chloroquine     | 2OOS:B | -8.8 |   |
| Pentamidine     | 2OOS:B | -8.8 |   |

|                 |        |      |                                                                                       |
|-----------------|--------|------|---------------------------------------------------------------------------------------|
| Acriflavinium   | 1ZW1:A | -8.7 | 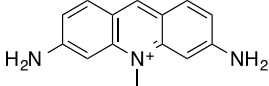   |
| Hycanthone      | 2OP0:B | -8.7 |    |
| Pyrimethamine   | 1NNU:B | -8.4 |    |
| Dactinomycin    | 2OL4:A | -8.4 |     |
| Ciclopirox      | 1NNU:B | -8.3 |   |
| Anisomycin      | 2OOS:B | -8.2 |  |
| Sulcotidil      | 1VRW:B | -7.6 |   |
| Benzalkonium    | 2OL4:B | -7.3 |   |
| Amphotericin B  | 2OP1:A | -7.1 |   |
| Cetylpyridinium | 2O2Y:C | -6.9 |   |



|             |        |      |                                                                                     |
|-------------|--------|------|-------------------------------------------------------------------------------------|
| Acivicin    | 1ZW1:B | -6.5 |  |
| Cetrimonium | 2OOS:B | -6.3 |   |

**Table S1.** The list of small molecules from the MicroSource Spectrum and Killer Collection library [1] that were docked into *Pf*ENR. The scores were calculated by AutoDock Vina. The PDB ID is given as ID:Chain.

**Table S2**

|                                                                    | <b>NADH</b>      | <b>crotonyl-CoA</b> | <b>Reference</b>     |
|--------------------------------------------------------------------|------------------|---------------------|----------------------|
| <b><math>K_m</math> (mM)</b>                                       | 0.24 $\pm$ 0.04  | 0.17 $\pm$ 0.06     | <b>current study</b> |
| <b><math>k_{cat}</math> (sec<sup>-1</sup>)</b>                     | 0.9 $\pm$ 0.1    | 1.0 $\pm$ 0.2       | <b>current study</b> |
| <b><math>k_{cat}/K_m</math> (mM<sup>-1</sup> sec<sup>-1</sup>)</b> | 3.8 $\pm$ 1.0    | 6.0 $\pm$ 1.1       | <b>current study</b> |
| <b><math>K_m</math> (mM)</b>                                       | 0.03 $\pm$ 0.004 | 0.17 $\pm$ 0.015    | <b>Ref 1</b>         |
| <b><math>k_{cat}</math> (sec<sup>-1</sup>)</b>                     | NR               | 1.62 $\pm$ 0.06     | <b>Ref 1</b>         |
| <b><math>k_{cat}/K_m</math> (mM<sup>-1</sup> sec<sup>-1</sup>)</b> | NR               | 9.8 $\pm$ 0.96      | <b>Ref 1</b>         |

**Table S2.** Kinetic parameters calculated for *PfENR*. The 100  $\mu$ L reaction volume contained a final concentration of 0.25  $\mu$ M ENR, 20 mM Tris/HCl buffer (pH 7.4), with 150 mM NaCl 100  $\mu$ M crotonyl-CoA, and 100  $\mu$ M NADH (Sigma). The enzyme was preincubated in 20 mM Tris/HCl buffer (pH 7.4), 150 mM NaCl and crotonyl-CoA, and initiated with NADH to reach its final concentration. The  $K_{m, \text{crotonyl-CoA}}$  was determined by varying the concentration of crotonyl-CoA while keeping the NADH concentration fixed at 100  $\mu$ M. Conversely, the  $K_{m, \text{NADH}}$  was determined by varying the concentration of NADH while keeping the crotonyl-CoA concentration fixed at 100  $\mu$ M.

Figure S1

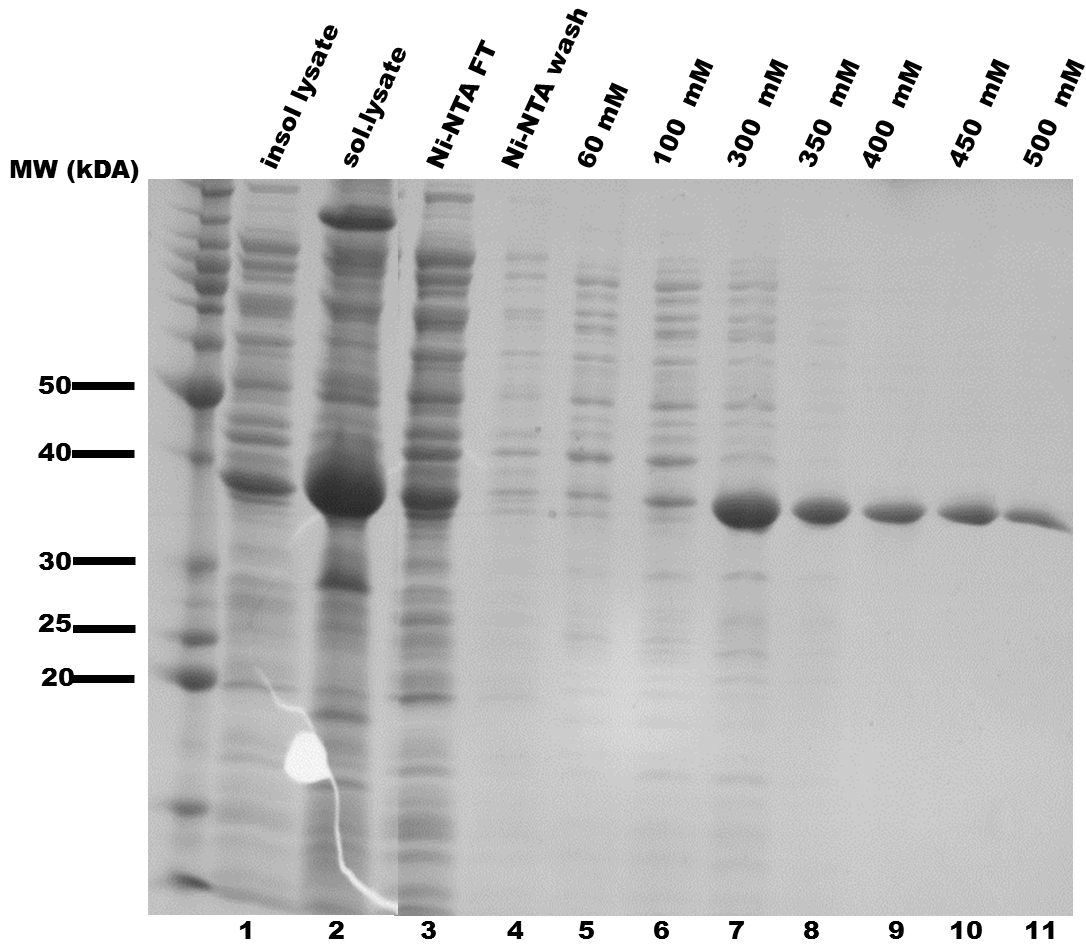

**Figure S1.** 12% SDS-PAGE showing expression and purification of *P. falciparum* ENR in pET28a plasmid encoding N-terminus 6xHis-tag in *E. coli* BL21 cells. Lane (1) Expression of PfENR insoluble fraction, (2) soluble fraction, (3) flow-through of Ni-NTA, and (4) buffer wash of Ni-NTA. Lanes (5-11) step gradient of imidazole elution of PfENR.

Figure S2

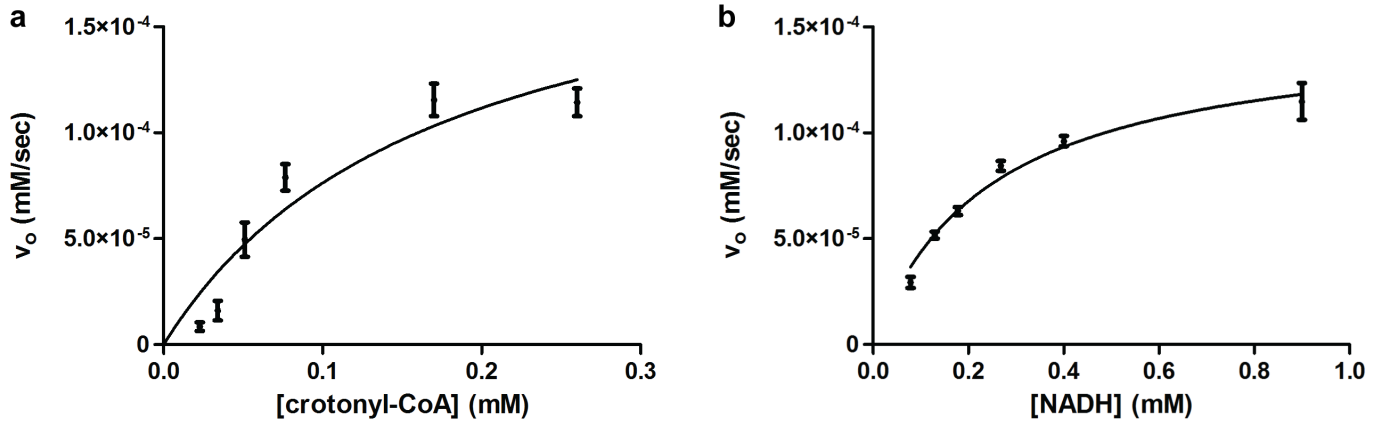

**Figure S2.** The Michaelis-Menten plots for *P. falciparum* ENR measuring the consumption of NADH at 340 nm ( $\epsilon_{\text{NADH}} = 6.22 \text{ mM}^{-1} \text{ cm}^{-1}$ ) for varying concentrations of crotonyl-CoA (a) and NADH (b) at 27 °C. The 100  $\mu\text{L}$  reaction volume contained a final concentration of 0.25  $\mu\text{M}$  ENR, 20 mM Tris/HCl buffer (pH 7.4) with 150 mM NaCl, 100  $\mu\text{M}$  crotonyl-CoA, and 100  $\mu\text{M}$  NADH (Sigma). The enzyme was preincubated in 20 mM Tris/HCl buffer (pH 7.4), 150 mM NaCl, and crotonyl-CoA, and initiated with NADH to reach its final concentration. a) The  $K_{m, \text{crotonyl-CoA}}$  was determined by varying the concentration of crotonyl-CoA (10-300  $\mu\text{M}$ ) while keeping the NADH concentration fixed at 100  $\mu\text{M}$ . b) The  $K_{m, \text{NADH}}$  value was revalidated by titrating NADH (20-500  $\mu\text{M}$ ) and keeping the crotonyl-CoA concentration constant at 100  $\mu\text{M}$ . Data was collected in triplicate, and the individual values were within 10% error.

Figure S3

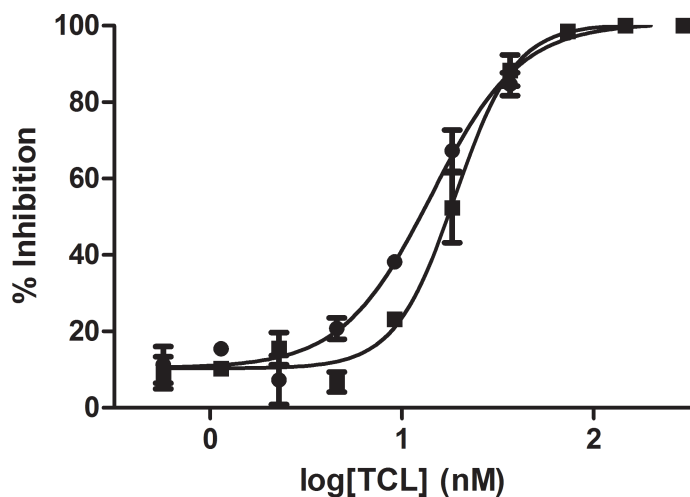

**Figure S3.** IC<sub>50</sub> binding curves for triclosan (TCL). The final 100 μL reaction volume contained 50 μM NAD<sup>+</sup>, 20 mM Tris/HCl buffer (pH 7.4), 150 mM NaCl, 200 μM crotonyl-CoA, 100 μM NADH, and 0.05 μM ENR. The ENR cocktail was preincubated with a final concentration of 50 μM NAD<sup>+</sup> (Sigma), 20 mM Tris/HCl buffer (pH 7.4), 150 mM NaCl, and varying amounts of triclosan (300 nM to 0.3 nM) (5% v/v DMSO) at 25 °C for 45 minutes. IC<sub>50</sub> for triclosan (●) without NAD<sup>+</sup> preincubation (■) with 50 μM NAD<sup>+</sup> preincubation. Data was collected in triplicate, and the individual values were within 10% error.

Figure S4

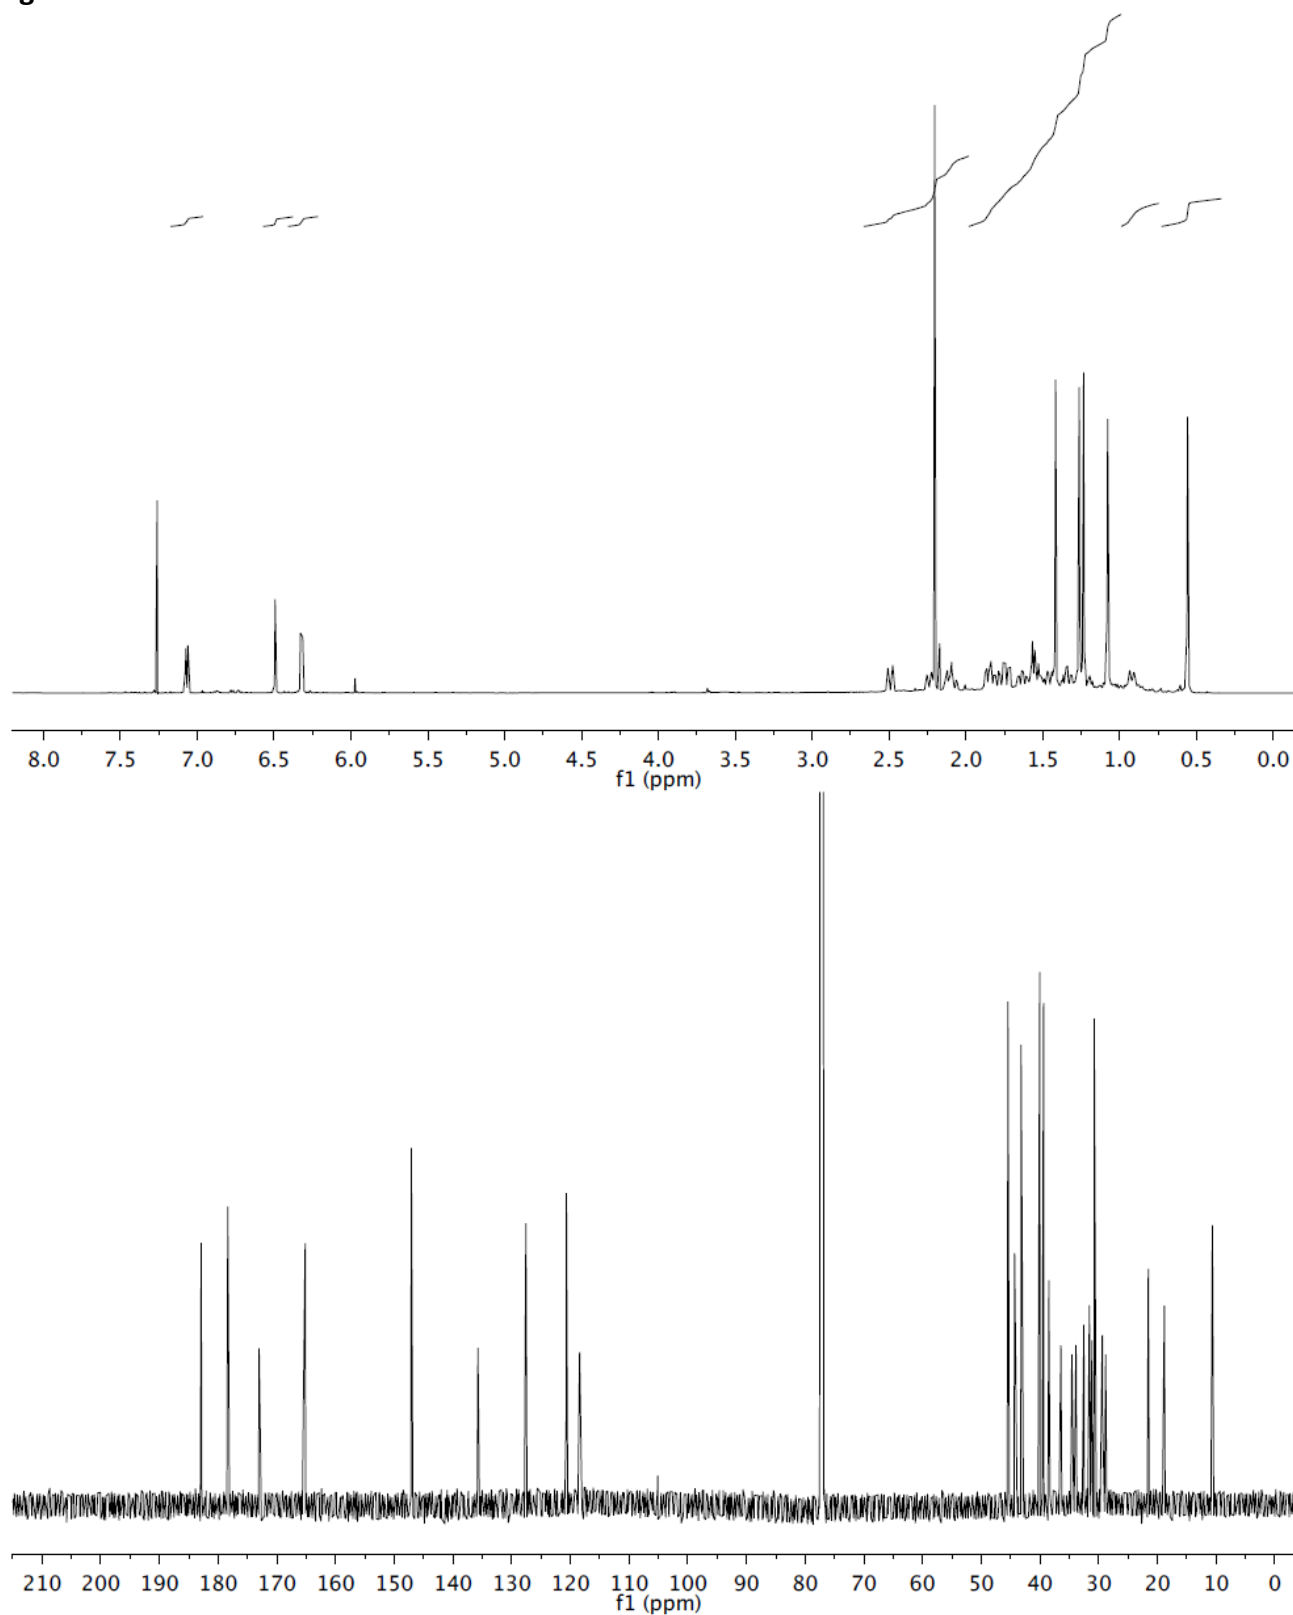

Figure S4.  $^1\text{H-NMR}$  (500 MHz) and  $^{13}\text{C-NMR}$  (125 MHz) of compound 1.

Figure S5

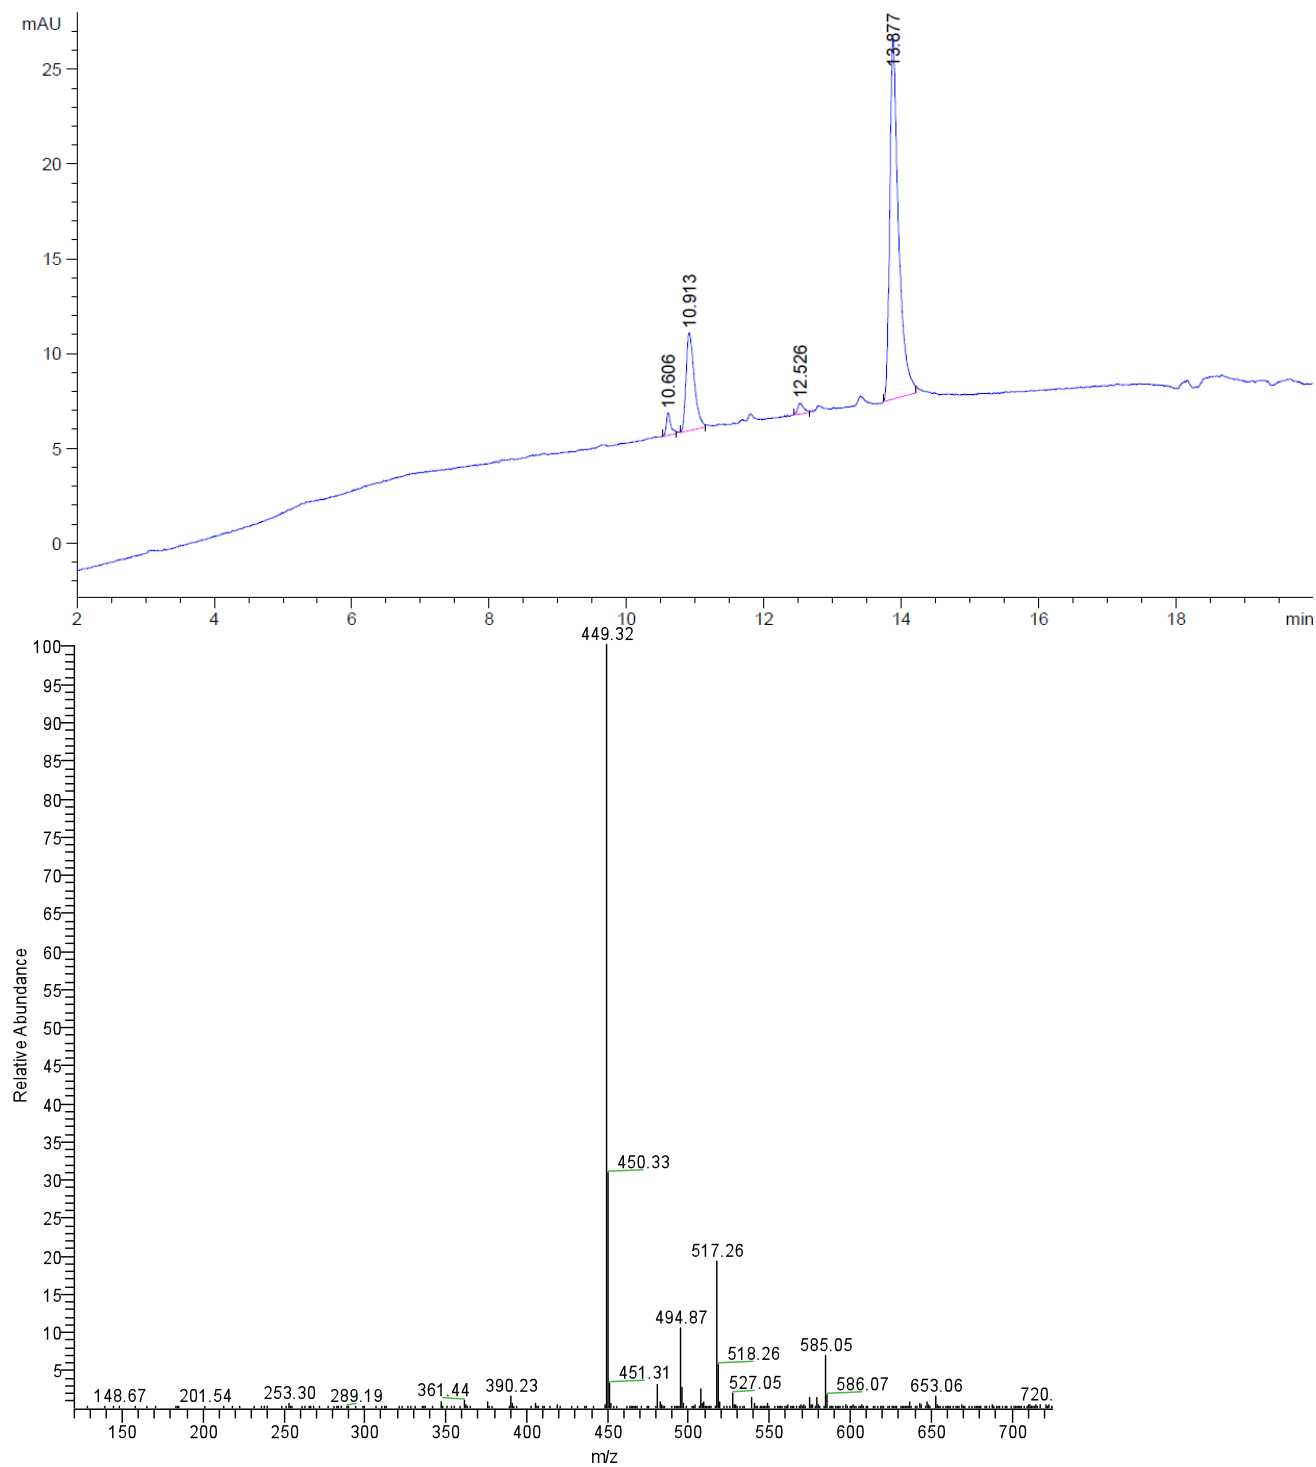

Figure S5. LC-MS Trace of compound 1 (NCl).

**Figure S6**

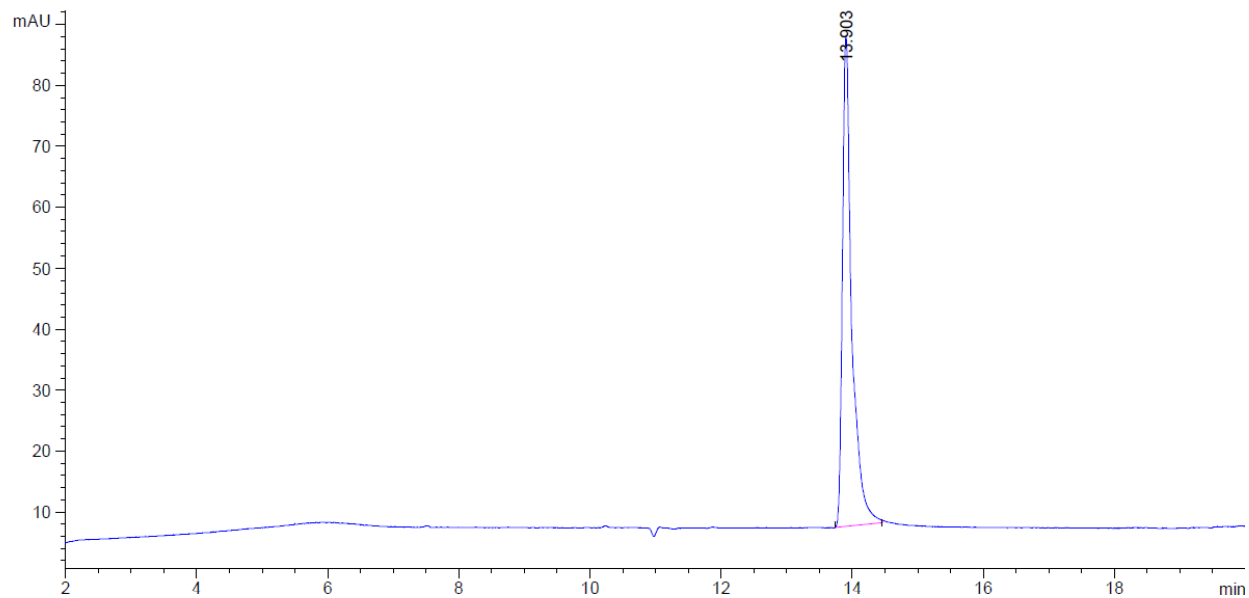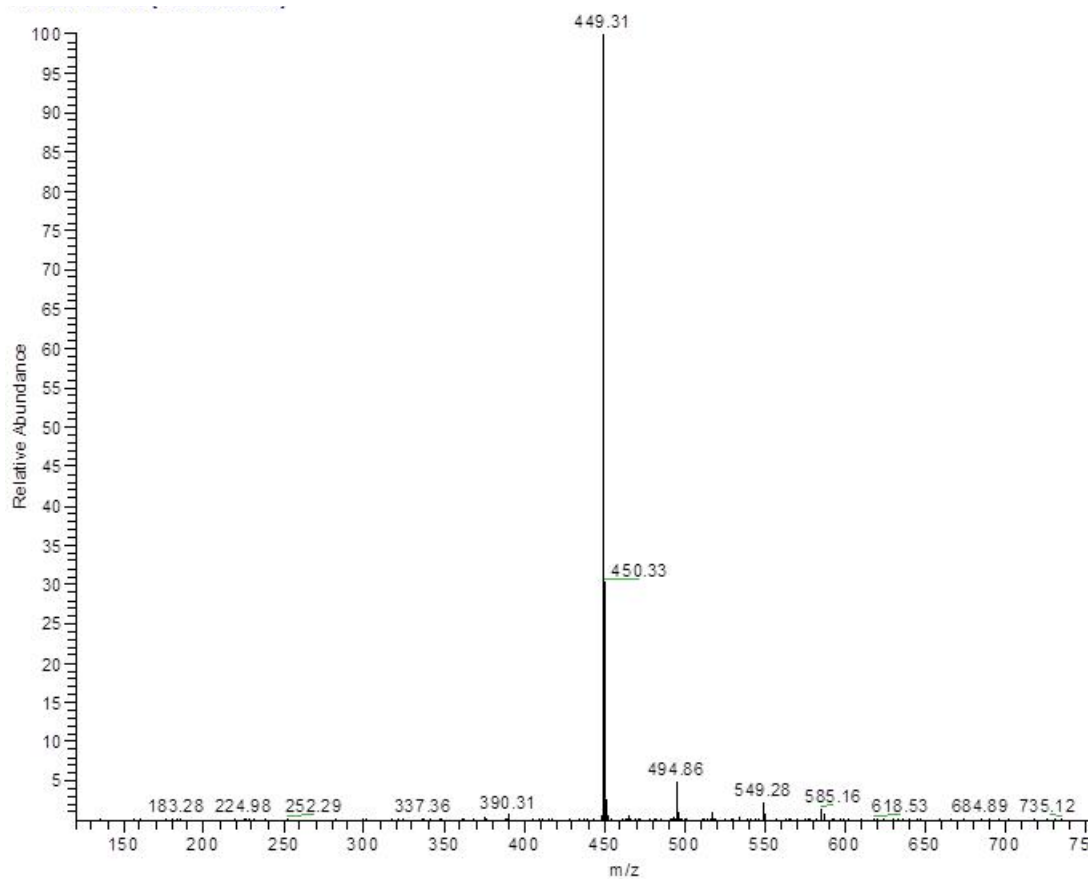

**Figure S6.** LC-MS Trace of compound **1** (Sigma-Aldrich).



Figure S7.

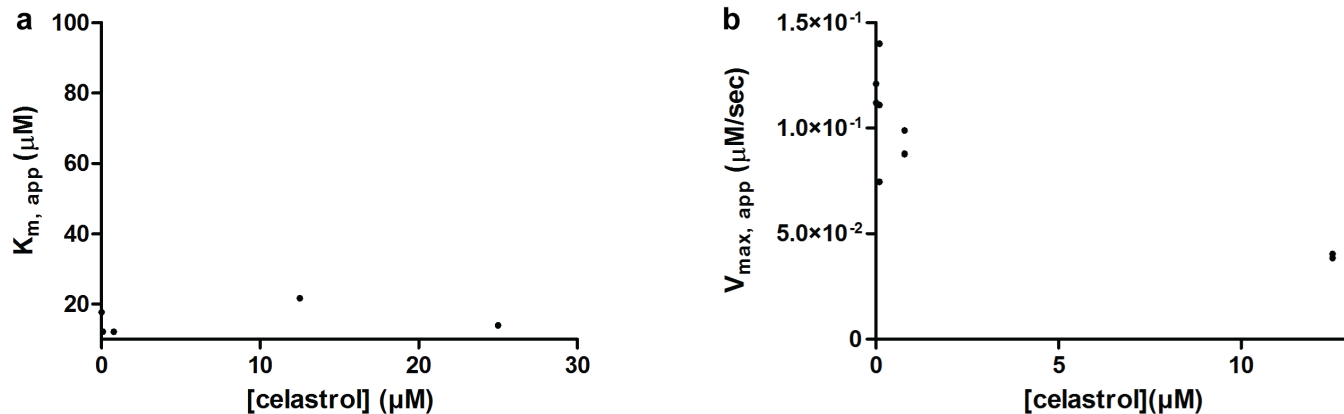

**Figure S7.** a)  $K_{m, app}$  plotted as a function of varying celastrol concentration.  $K_{m, app}$  is independent of varying celastrol concentration. b) Scatter plot of  $V_{max, app}$  as a function of varying celastrol concentration. The  $K_{i, app}$  ( $5.3 \mu\text{M}$ ) was calculated from the slope of the line ( $r^2 = 0.89$ ). These experiments were repeated in triplicate.

Figure S8.

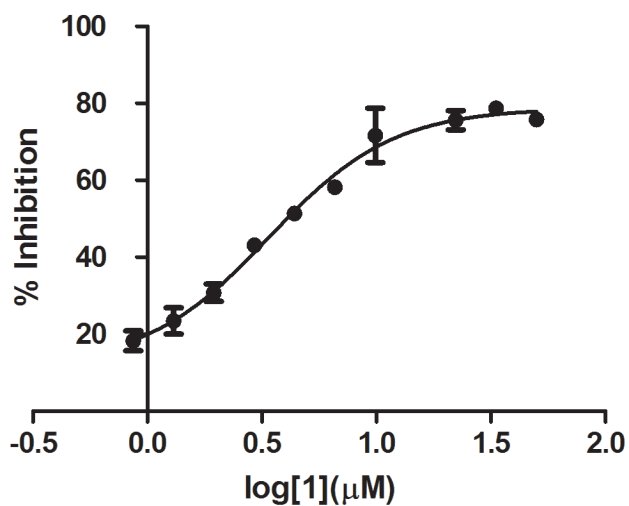

**Figure S8.** IC<sub>50</sub> binding curve for celastrol (compound **1**) in the presence of 0.01% Triton-X. The final 100 μL reaction volume contained 50 μM NAD<sup>+</sup>, 20 mM Tris/HCl buffer (pH 7.4), 150 mM NaCl, 0.01% Triton-X, 200 μM crotonyl-CoA, 100 μM NADH, and 0.05 μM ENR. ENR was preincubated at 25 °C for 45 minutes with a final concentration of 50 μM NAD<sup>+</sup>, 20 mM Tris/HCl buffer (pH 7.4), 150 mM NaCl, and varying concentrations (0.9-50 μM) of **1**. Data was collected in duplicate, and the individual values were within 10% error.

Figure S9.

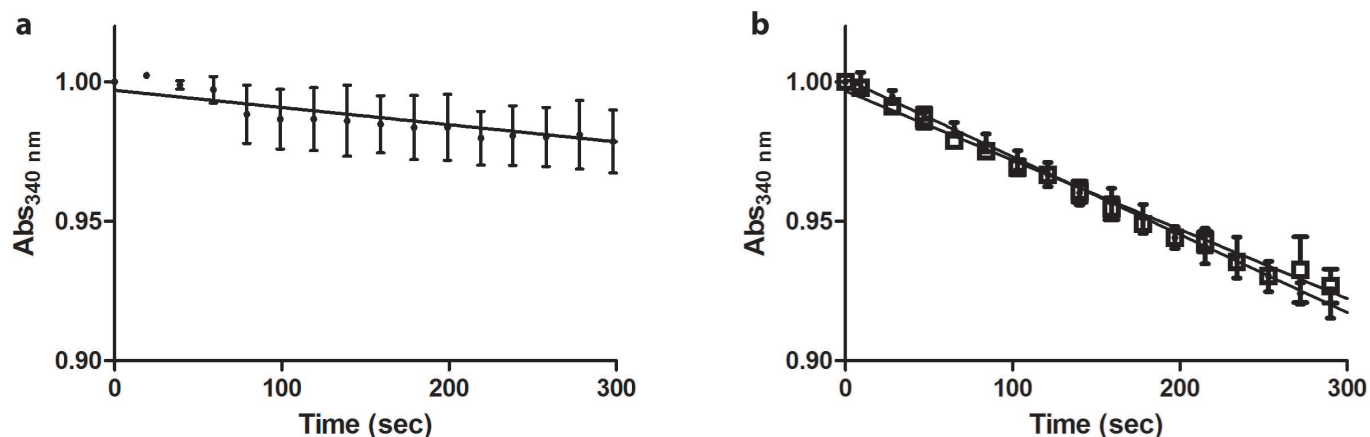

**Figure S9.** A comparison between the activity of *PfENR* a) with and without b) rapid dilution. a) The final 100  $\mu\text{L}$  reaction volume contained 50  $\mu\text{M}$   $\text{NAD}^+$ , 20 mM Tris/HCl buffer (pH 7.4), 150 mM NaCl, 0.01% Triton-X, 200  $\mu\text{M}$  crotonyl-CoA, 100  $\mu\text{M}$  NADH, 15  $\mu\text{M}$  of compound **1**, and 0.05  $\mu\text{M}$  ENR. Data was collected in duplicate with  $r^2$  values greater than 0.97. b) 3  $\mu\text{M}$  *PfENR* was incubated with 15  $\mu\text{M}$  of compound **1** and 5 mM  $\text{NAD}^+$  for 45 minutes at 25  $^\circ\text{C}$ . The protein was diluted 100-fold with 200  $\mu\text{M}$  crotonyl-CoA and 100  $\mu\text{M}$  NADH to initiate the reaction. The two lines represent the activity of *PfENR* with celastrol (solid circle) and DMSO (open square). This experiment was conducted in triplicate with  $r^2$  values greater than 0.97.

Figure S10.

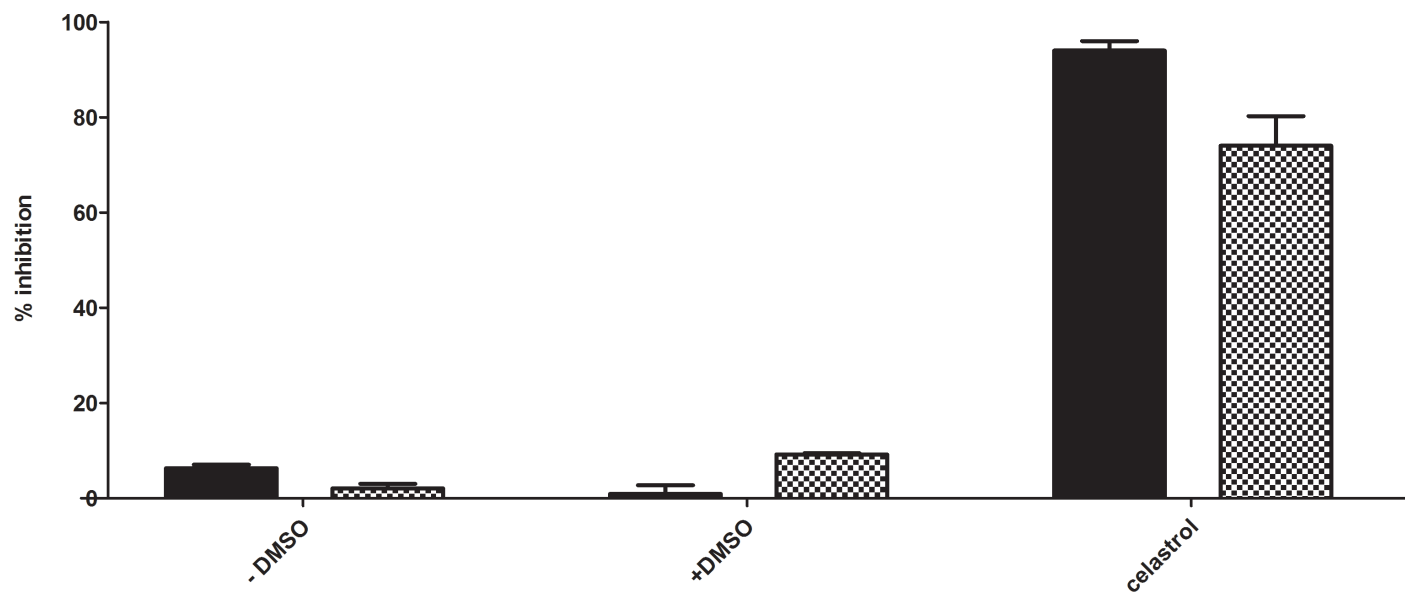

**Figure S10.** Comparison of *Pf*ENR inhibition without iodoacetamide treatment (solid black) and with iodoacetamide treatment (checkered box). The final 100  $\mu$ L reaction volume contained 50  $\mu$ M  $\text{NAD}^+$ , 20 mM Tris/HCl buffer (pH 7.4), 150 mM NaCl, 0.01% Triton-X, 200  $\mu$ M crotonyl-CoA, 100  $\mu$ M NADH, 50  $\mu$ M of compound **1**, and 0.05  $\mu$ M ENR. These experiments were conducted in triplicate.

Figure S11

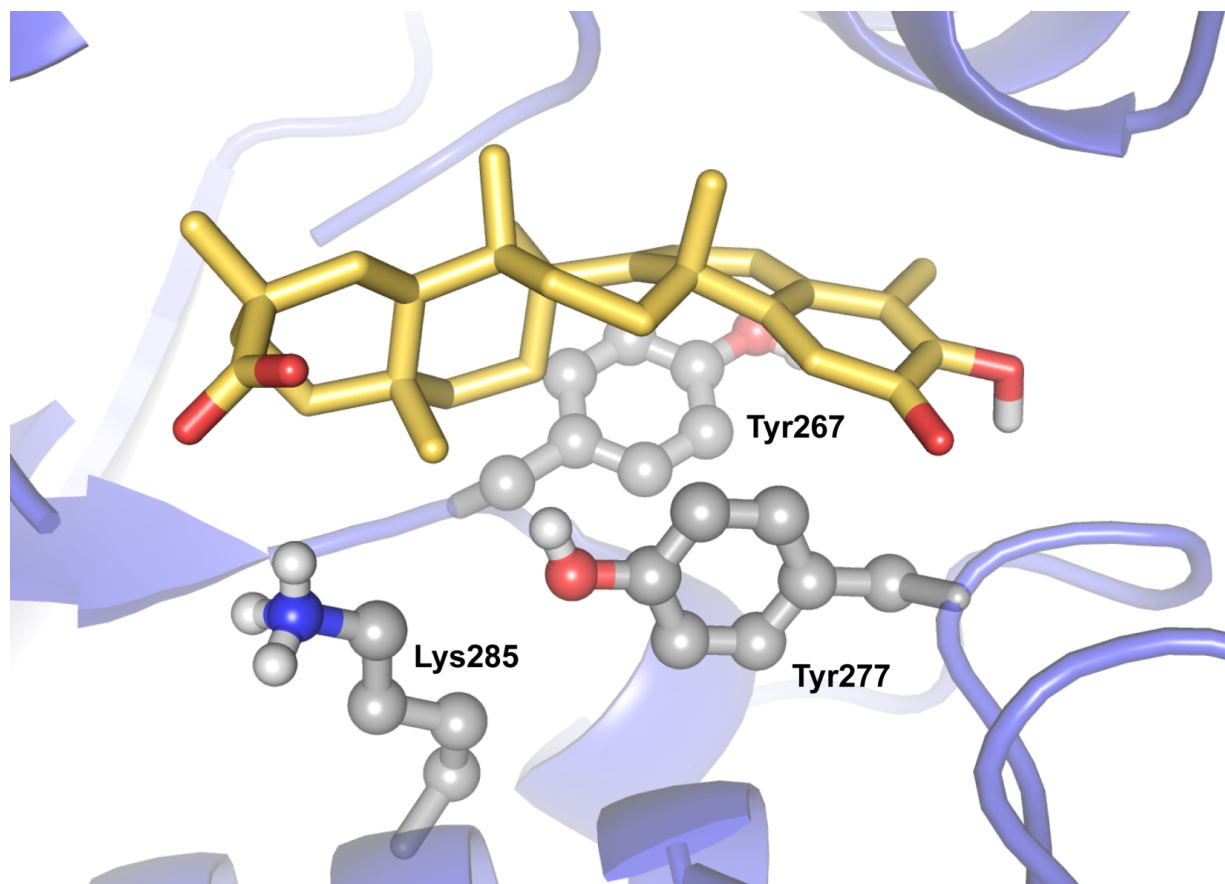

**Figure S11.** The best-predicted celastrol docking pose, obtained when the molecule was docked into the 2OL4 structure. Part of the protein has been removed to facilitate visualization.
